# Supplementary material for: Early and unrestricted access to high-efficacy disease-modifying therapies: a consensus to optimize benefits for people living with multiple sclerosis
Source: Springer Nature journal article supplement (doi:10.1007/s00415-021-10836-8), 2021-10-09
Supplement: MOESM1 [file 19742704]

| COUNTRY        | SOURCE / Link to document                                                                                                                                                                                                                                                                                                                                                                                                                                                                                                                                                                                                                                                                                                                                                                                                                                                                                                                                                                                                                            |
|----------------|------------------------------------------------------------------------------------------------------------------------------------------------------------------------------------------------------------------------------------------------------------------------------------------------------------------------------------------------------------------------------------------------------------------------------------------------------------------------------------------------------------------------------------------------------------------------------------------------------------------------------------------------------------------------------------------------------------------------------------------------------------------------------------------------------------------------------------------------------------------------------------------------------------------------------------------------------------------------------------------------------------------------------------------------------|
| Austria        | <a href="https://www.sozialversicherung.at/oeko/views/detail.xhtml?pharmaNumber=4472121">https://www.sozialversicherung.at/oeko/views/detail.xhtml?pharmaNumber=4472121</a>                                                                                                                                                                                                                                                                                                                                                                                                                                                                                                                                                                                                                                                                                                                                                                                                                                                                          |
| ROMANIA        | <a href="https://tinyurl.com/yxckfvbv">https://tinyurl.com/yxckfvbv</a>                                                                                                                                                                                                                                                                                                                                                                                                                                                                                                                                                                                                                                                                                                                                                                                                                                                                                                                                                                              |
| Netherlands    | <a href="https://www.medicijnkosten.nl/medicijn?artikel=OCREVUS+INFLVST+CONC+300MG%2F10ML+%2830MG%2FML%29+FLACON&amp;id=79bfd3b3ee4c175ecc222ee4d400380">https://www.medicijnkosten.nl/medicijn?artikel=OCREVUS+INFLVST+CONC+300MG%2F10ML+%2830MG%2FML%29+FLACON&amp;id=79bfd3b3ee4c175ecc222ee4d400380</a>                                                                                                                                                                                                                                                                                                                                                                                                                                                                                                                                                                                                                                                                                                                                          |
| France         | <a href="https://www.has-sante.fr/upload/docs/evamed/CT-16878_OCREVUS_PICins_SEP-R_avis2_CT16878_def.pdf">https://www.has-sante.fr/upload/docs/evamed/CT-16878_OCREVUS_PICins_SEP-R_avis2_CT16878_def.pdf</a><br><a href="https://www.legifrance.gouv.fr/jorf/id/JORFTEXT000038175160?tab_selection=all&amp;searchField=ALL&amp;query=OCREVUS&amp;page=1&amp;init=true">https://www.legifrance.gouv.fr/jorf/id/JORFTEXT000038175160?tab_selection=all&amp;searchField=ALL&amp;query=OCREVUS&amp;page=1&amp;init=true</a><br><a href="https://www.has-sante.fr/upload/docs/application/pdf/2018-07/ocrevus_pic_ins_avis_3_ct16833.pdf">https://www.has-sante.fr/upload/docs/application/pdf/2018-07/ocrevus_pic_ins_avis_3_ct16833.pdf</a><br><a href="https://www.legifrance.gouv.fr/jorf/id/JORFTEXT000038175207?tab_selection=all&amp;searchField=ALL&amp;query=OCREVUS&amp;page=1&amp;init=true">https://www.legifrance.gouv.fr/jorf/id/JORFTEXT000038175207?tab_selection=all&amp;searchField=ALL&amp;query=OCREVUS&amp;page=1&amp;init=true</a> |
| Lithuania      | <a href="#">Reimbursed medicines list with reimbursed indications – link.</a><br><a href="#">MS treatment guidelines – link.</a>                                                                                                                                                                                                                                                                                                                                                                                                                                                                                                                                                                                                                                                                                                                                                                                                                                                                                                                     |
| Portugal       | <a href="https://www.infarmed.pt/documents/15786/1424140/Relat%C3%B3rio+p%C3%BAblico+de+avalia%C3%A7%C3%A3o+de+Medicamento+Ocrevus+%28DCI+ocrelizumab%29+2020/5f7e7157-561c-6e22-5582-199404eedb1f">https://www.infarmed.pt/documents/15786/1424140/Relat%C3%B3rio+p%C3%BAblico+de+avalia%C3%A7%C3%A3o+de+Medicamento+Ocrevus+%28DCI+ocrelizumab%29+2020/5f7e7157-561c-6e22-5582-199404eedb1f</a>                                                                                                                                                                                                                                                                                                                                                                                                                                                                                                                                                                                                                                                    |
| Italy          | <a href="https://www.gazzettaufficiale.it/eli/gu/2018/09/03/204/sq/pdf">https://www.gazzettaufficiale.it/eli/gu/2018/09/03/204/sq/pdf</a><br>Registry:<br><a href="https://www.gazzettaufficiale.it/do/atto/serie_generale/caricaPdf?cdimg=18A0571300100010110001&amp;dqu=2018-09-03&amp;art.dataPubblicazioneGazzetta=2018-09-03&amp;art.codiceRedazionale=18A05713&amp;art.num=1&amp;art.tiposerie=SG">https://www.gazzettaufficiale.it/do/atto/serie_generale/caricaPdf?cdimg=18A0571300100010110001&amp;dqu=2018-09-03&amp;art.dataPubblicazioneGazzetta=2018-09-03&amp;art.codiceRedazionale=18A05713&amp;art.num=1&amp;art.tiposerie=SG</a>                                                                                                                                                                                                                                                                                                                                                                                                    |
| Slovenia       | <a href="http://www.cbz.si/cbz/bazazdr2.nsf/o/4E6B82372BD70082C125822700050445?opendocument">http://www.cbz.si/cbz/bazazdr2.nsf/o/4E6B82372BD70082C125822700050445?opendocument</a>                                                                                                                                                                                                                                                                                                                                                                                                                                                                                                                                                                                                                                                                                                                                                                                                                                                                  |
| Poland         | <a href="https://www.gov.pl/web/zdrowie/obwieszczenie-ministra-zdrowia-z-dnia-21-pazdziernika-2020-r-w-sprawie-wykazu-refundowanych-lekow-srodkow-spozywczych-specjalnego-przeznaczenia-zywniowego-oraz-wyrobow-medycznych-na-1-listopada-2020-r">https://www.gov.pl/web/zdrowie/obwieszczenie-ministra-zdrowia-z-dnia-21-pazdziernika-2020-r-w-sprawie-wykazu-refundowanych-lekow-srodkow-spozywczych-specjalnego-przeznaczenia-zywniowego-oraz-wyrobow-medycznych-na-1-listopada-2020-r</a>                                                                                                                                                                                                                                                                                                                                                                                                                                                                                                                                                        |
| Sweden         | <a href="https://janusinfo.se/nationelltinforandeaviakemedel/produktinfo/ocrevusokrelizumab.4.1dfa69ad1630328ad7c3b9c3.html">https://janusinfo.se/nationelltinforandeaviakemedel/produktinfo/ocrevusokrelizumab.4.1dfa69ad1630328ad7c3b9c3.html</a><br><a href="https://www.tlv.se/download/18.15b37133165bb795253817be/1536757705126/bes180903_underlag_ocrevus.pdf">https://www.tlv.se/download/18.15b37133165bb795253817be/1536757705126/bes180903_underlag_ocrevus.pdf</a>                                                                                                                                                                                                                                                                                                                                                                                                                                                                                                                                                                       |
| Slovakia       | <a href="https://www.health.gov.sk/Clanok?lieky202011">https://www.health.gov.sk/Clanok?lieky202011</a> (section - Časť B: Indikačné obmedzenia)                                                                                                                                                                                                                                                                                                                                                                                                                                                                                                                                                                                                                                                                                                                                                                                                                                                                                                     |
| Croatia        | <a href="http://www.hzzo.hr/zdravstveni-sustav-rh/trazilica-za-lijekove-s-vazecih-lista/">http://www.hzzo.hr/zdravstveni-sustav-rh/trazilica-za-lijekove-s-vazecih-lista/</a>                                                                                                                                                                                                                                                                                                                                                                                                                                                                                                                                                                                                                                                                                                                                                                                                                                                                        |
| Czech Republic | <a href="http://www.sukl.cz/modules/medication/detail.php?code=0222682&amp;tab=prices">http://www.sukl.cz/modules/medication/detail.php?code=0222682&amp;tab=prices</a>                                                                                                                                                                                                                                                                                                                                                                                                                                                                                                                                                                                                                                                                                                                                                                                                                                                                              |
| GERMANY        | <a href="https://www.iqwig.de/en/projects/a18-06.html">https://www.iqwig.de/en/projects/a18-06.html</a>                                                                                                                                                                                                                                                                                                                                                                                                                                                                                                                                                                                                                                                                                                                                                                                                                                                                                                                                              |
| Luxembourg     | <a href="https://cns.public.lu/dam-assets/legislations/texte-coordonne/med-comm/2011-liste-comm.pdf">https://cns.public.lu/dam-assets/legislations/texte-coordonne/med-comm/2011-liste-comm.pdf</a>                                                                                                                                                                                                                                                                                                                                                                                                                                                                                                                                                                                                                                                                                                                                                                                                                                                  |
| Bulgaria       | <a href="https://www.nhif.bg/page/45">https://www.nhif.bg/page/45</a>                                                                                                                                                                                                                                                                                                                                                                                                                                                                                                                                                                                                                                                                                                                                                                                                                                                                                                                                                                                |
| Finland        |                                                                                                                                                                                                                                                                                                                                                                                                                                                                                                                                                                                                                                                                                                                                                                                                                                                                                                                                                                                                                                                      |
| Estonia        | <a href="https://www.riigiteataja.ee/akt/118082020001">https://www.riigiteataja.ee/akt/118082020001</a>                                                                                                                                                                                                                                                                                                                                                                                                                                                                                                                                                                                                                                                                                                                                                                                                                                                                                                                                              |
| Switzerland    | <a href="http://www.spezialitätenliste.ch">http://www.spezialitätenliste.ch</a>                                                                                                                                                                                                                                                                                                                                                                                                                                                                                                                                                                                                                                                                                                                                                                                                                                                                                                                                                                      |
| Hungary        | <a href="http://neak.gov.hu/data/cms1027540/PUPHA_GYOGYSZER_LAKOSSAGI_20201101_v3.xls">http://neak.gov.hu/data/cms1027540/PUPHA_GYOGYSZER_LAKOSSAGI_20201101_v3.xls</a><br>This excel contains all the reimbursed therapies, there is no Ocrevus in it.                                                                                                                                                                                                                                                                                                                                                                                                                                                                                                                                                                                                                                                                                                                                                                                              |
| Latvia         | <a href="http://www.vmnvd.gov.lv/lv/kompensejamie-medikamenti/kompensejamo-zalu-saraksti">http://www.vmnvd.gov.lv/lv/kompensejamie-medikamenti/kompensejamo-zalu-saraksti</a>                                                                                                                                                                                                                                                                                                                                                                                                                                                                                                                                                                                                                                                                                                                                                                                                                                                                        |
| Denmark        | <a href="#">Link</a>                                                                                                                                                                                                                                                                                                                                                                                                                                                                                                                                                                                                                                                                                                                                                                                                                                                                                                                                                                                                                                 |
| Spain          | <a href="https://www.msrebs.gob.es/profesionales/medicamentos.do?metodo=verDetalle&amp;cn=720456">https://www.msrebs.gob.es/profesionales/medicamentos.do?metodo=verDetalle&amp;cn=720456</a> (MoH database)<br><a href="https://www.aemps.gob.es/medicamentosUsoHumano/informesPublicos/docs/IPT-ocrelizumab-Ocrevus-esclerosis-multiple.pdf?x53593">https://www.aemps.gob.es/medicamentosUsoHumano/informesPublicos/docs/IPT-ocrelizumab-Ocrevus-esclerosis-multiple.pdf?x53593</a> (HTA report)                                                                                                                                                                                                                                                                                                                                                                                                                                                                                                                                                   |
